# Supplementary material for: Retrieval of aerosol components directly from satellite and ground-based measurements
Source: Copernicus journal article supplement (doi:10.5194/acp-19-13409-2019), 2019-11-04
Supplement: Supplementary file 1 [file acp-19-13409-2019-supplement.pdf]

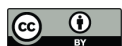

*Supplement of*

## **Retrieval of aerosol components directly from satellite and ground-based measurements**

**Lei Li et al.**

*Correspondence to:* Oleg Dubovik ([oleg.dubovik@univ-lille.fr](mailto:oleg.dubovik@univ-lille.fr)) and Yevgeny Derimian ([yevgeny.derimian@univ-lille.fr](mailto:yevgeny.derimian@univ-lille.fr))

The copyright of individual parts of the supplement might differ from the CC BY 4.0 License.

Supplement:

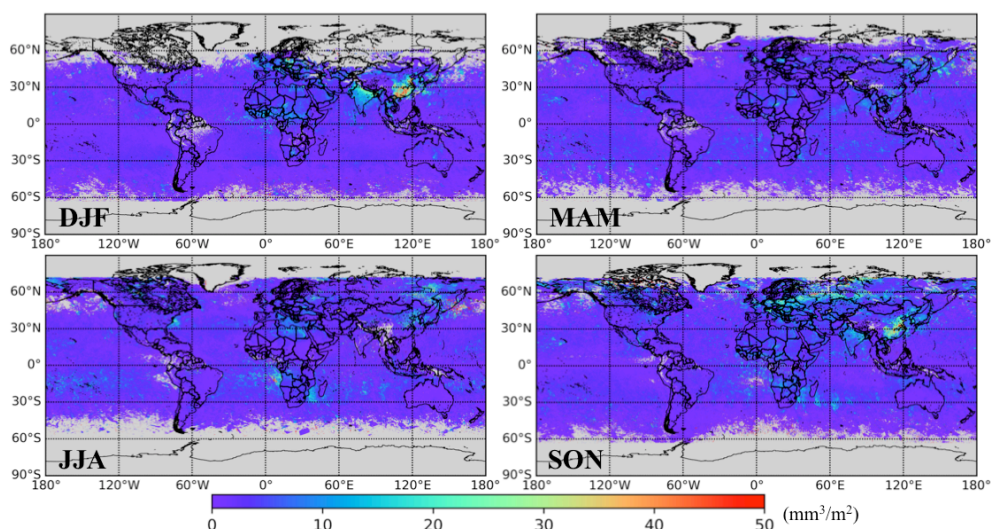

**Figure S1.** Seasonal variability of fine mode aerosol water content (FAWC) volume concentration ( $\text{mm}^3/\text{m}^2$ ) over the globe in 2008 as retrieved by GRASP/Composition algorithm from POLDER/PARASOL satellite observations.

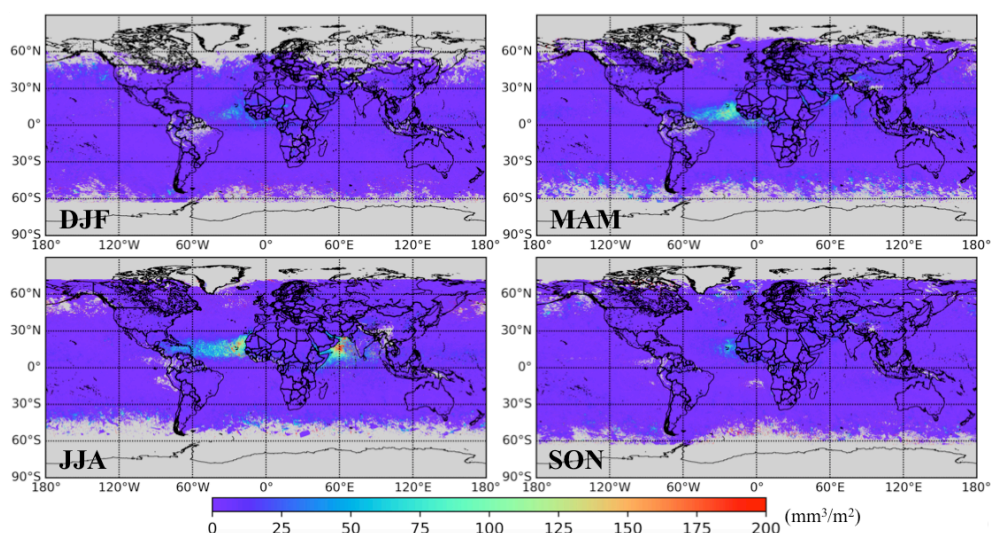

**Figure S2.** Same as Fig. S1, but for coarse mode aerosol water content (CAWC)

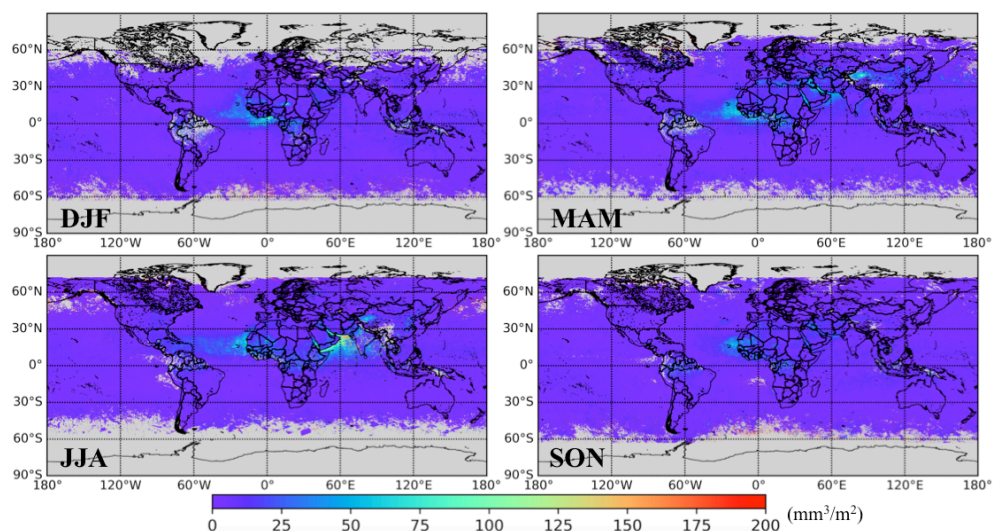

**Figure S3.** Same as Fig. S1, but for coarse mode non-absorbing soluble (CNAS)

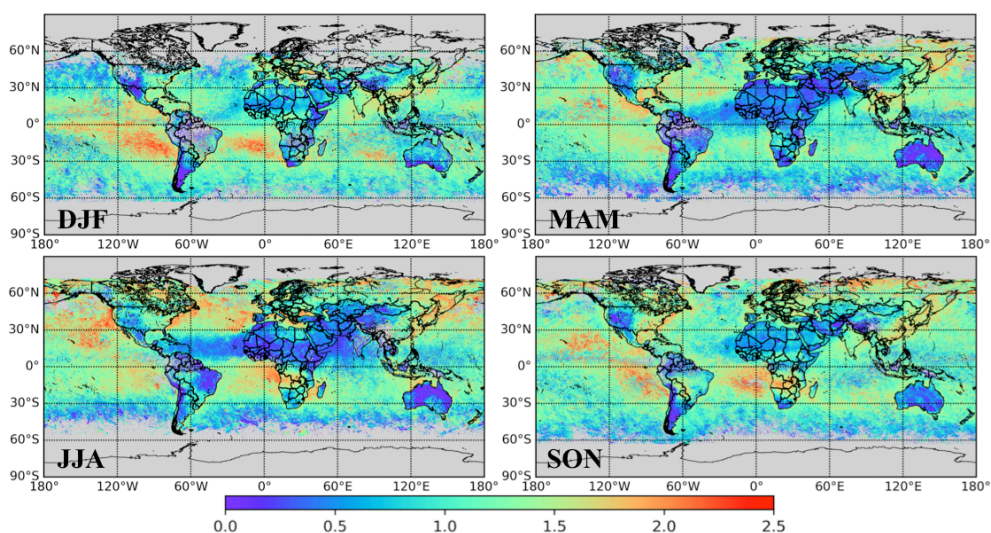

**Figure S4.** Same as Fig. S1, but for Ångström Exponent
